# Supplementary material for: Tuning the ferroelectric phase transition of PVDF by uniaxially stretching crosslinked PVDF films with CFCH bonds
Source: Royal Society of Chemistry journal article supplement (doi:10.1039/d0tc02559c), 2020-01-01
Supplement: d0tc02559c1.pdf [file d0tc02559c1.pdf]

## Supporting Information

# Tuning Ferroelectric Phase Transition of PVDF by Uniaxially Stretching Crosslinked PVDF Films with CF=CH Bonds

Xiao Wang,<sup>a</sup> Baobao Qiao,<sup>a</sup> Shaobo Tan,<sup>a</sup> Weiwei Zhu,<sup>\*b</sup> and Zhicheng Zhang<sup>\*ac</sup>

<sup>a</sup>Department of Applied Chemistry, Xi'an Key Laboratory of Sustainable Energy Materials Chemistry, School of Science, Xi'an Jiaotong University, Xi'an 710049, Shaanxi P. R, China.

<sup>b</sup>Zhejiang Research Institute of Chemical Industry, No. 387 Tianmushan Road, Hangzhou 310000, Zhejiang P. R, China.

\*Corresponding Author

Tel: 86-29-82663937. E-mail: [zhichengzhang@mail.xjtu.edu.cn](mailto:zhichengzhang@mail.xjtu.edu.cn)

E-mail: [zhuweiwei@sinochem.com](mailto:zhuweiwei@sinochem.com)

Table S1. <sup>19</sup>F NMR assignment of P(VDF-CTFE) and P(VDF-DB)

| peak | sequence                                                                                                                         | Chemical Shift (ppm) |
|------|----------------------------------------------------------------------------------------------------------------------------------|----------------------|
| a    | -CF=CHCF <sub>2</sub> CH <sub>2</sub> CF <sub>2</sub> -                                                                          | -89.2                |
| b    | -CF <sub>2</sub> CH <sub>2</sub> CF <sub>2</sub> CH <sub>2</sub> CF <sub>2</sub> -                                               | -92.3                |
| c    | -CFCICH <sub>2</sub> CF <sub>2</sub> CH <sub>2</sub> CF <sub>2</sub> -                                                           | -93.16 to -93.67     |
| d    | -CH <sub>2</sub> CH <sub>2</sub> CF <sub>2</sub> CH <sub>2</sub> CF <sub>2</sub> -                                               | -94.26 to -97.31     |
| e    | -CF <sub>2</sub> CFCICF <sub>2</sub> CFCICF <sub>2</sub> -                                                                       | -106.5 to -107.82    |
| f    | -CF <sub>2</sub> CH <sub>2</sub> CF <sub>2</sub> CF <sub>2</sub> CFCI-                                                           | -108.0 to -109.34    |
| g    | -CF <sub>2</sub> CFCICF <sub>2</sub> CFCI-CH <sub>2</sub> -                                                                      | -109.34 to -113.10   |
| h    | -CF <sub>2</sub> CFCICF <sub>2</sub> CF=CH-                                                                                      | -110.1 to -111.6     |
| i    | -CF <sub>2</sub> CF <sub>2</sub> CF=CHCF <sub>2</sub> -, -CF <sub>2</sub> CH <sub>2</sub> CF <sub>2</sub> CF <sub>2</sub> CF=CH- | -113.4 to -113.7     |
| j    | -CF <sub>2</sub> CH <sub>2</sub> CF <sub>2</sub> CF <sub>2</sub> CH <sub>2</sub> -                                               | -114.7               |
| k    | -CH <sub>2</sub> CF <sub>2</sub> CF <sub>2</sub> CH <sub>2</sub> CH <sub>2</sub> -                                               | -116.6 to -118.8     |
| l    | -CH <sub>2</sub> CF <sub>2</sub> CF <sub>2</sub> CFCI-CH <sub>2</sub> -                                                          | -118.25 to -119.98   |
| m    | -CF <sub>2</sub> CF <sub>2</sub> CFCI-CH <sub>2</sub> CF <sub>2</sub> -                                                          | -120.35 to -123.32   |
| n    | -CH <sub>2</sub> CF <sub>2</sub> CF <sub>2</sub> CF=CH-                                                                          | -120.0 to -120.8     |
| o    | -CF <sub>2</sub> CH <sub>2</sub> CFCICF <sub>2</sub> CH <sub>2</sub> -                                                           | -129.46 to -130.53   |

Table S2. Peak area of stretched-P(VDF-DB) from temperature-dependent dielectric spectroscopy

| Sample        | Peak area (%) |      |
|---------------|---------------|------|
|               | RFE           | FE   |
| P(VDF-DB)-6S  | 9.3           | 91.7 |
| P(VDF-DB)-9S  | 19.2          | 80.8 |
| P(VDF-DB)-12S | 78.1          | 21.9 |
| P(VDF-DB)-20S | 100           | -    |

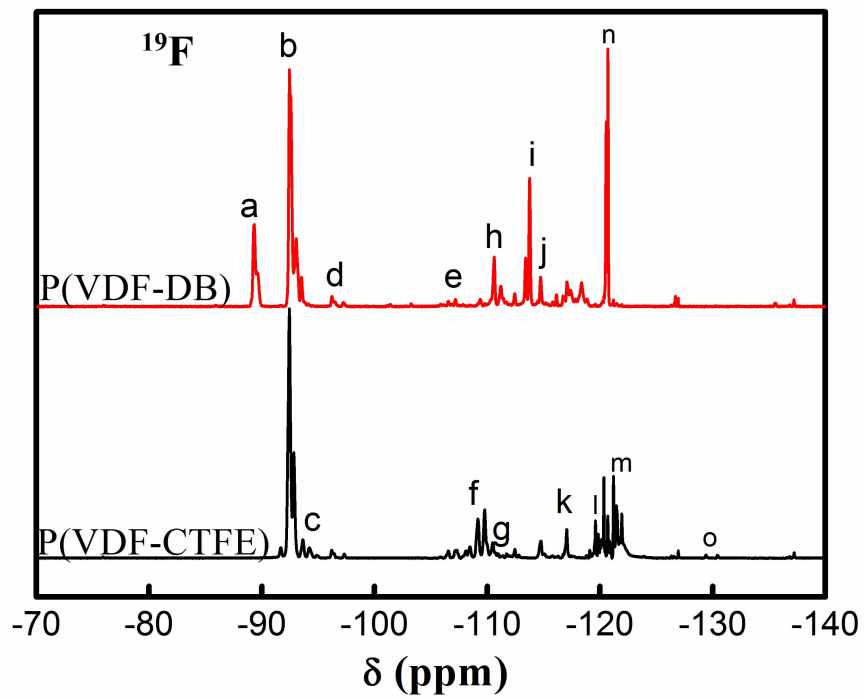

**Fig. S1.**  $^{19}\text{F}$  NMR of P(VDF-CTFE) and P(VDF-DB) bearing 80 mol% VDF



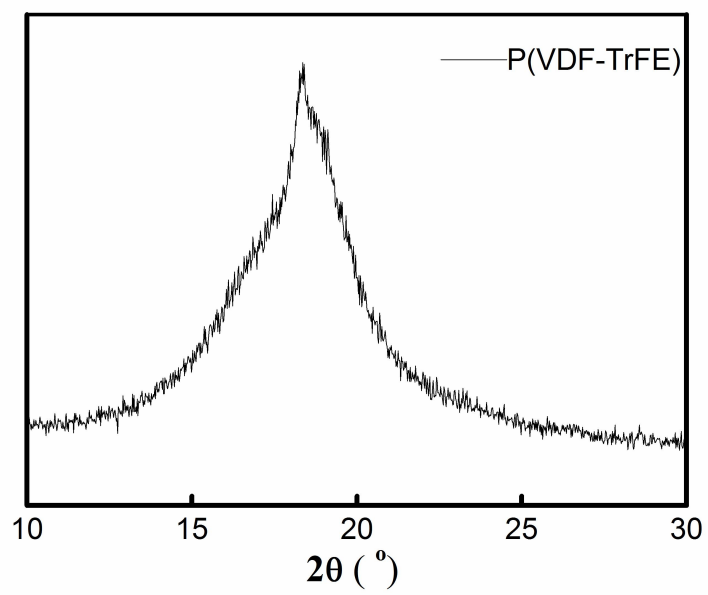

**Fig. S2.** XRD of P(VDF-TrFE) (80/20 mol%)

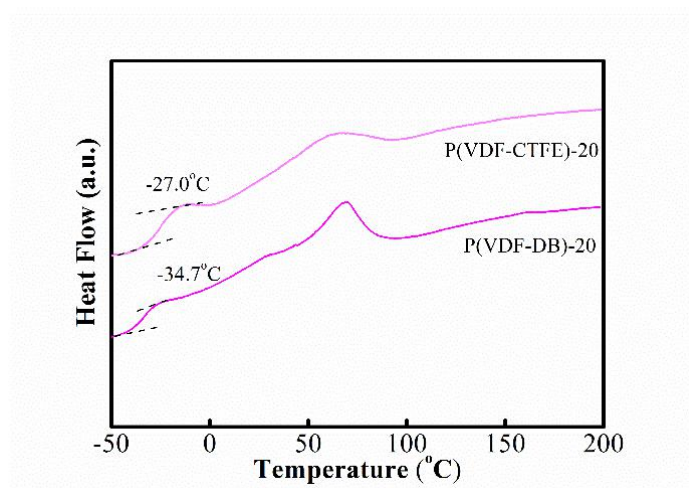

**Fig. S3.** DSC curves of P(VDF-CTFE) with various VDF content

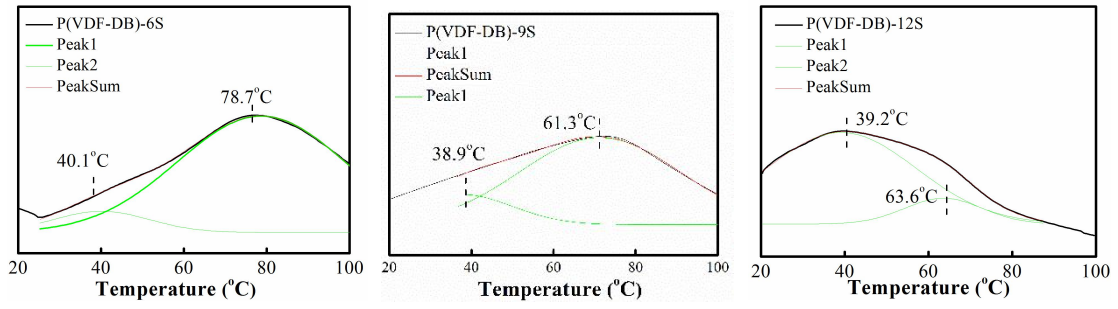

**Fig. S4.** permittivity depending on temperature of stretched-P(VDF-DB) with 6 mol%,

9 mol%, 12 mol% and 20 mol% DB content



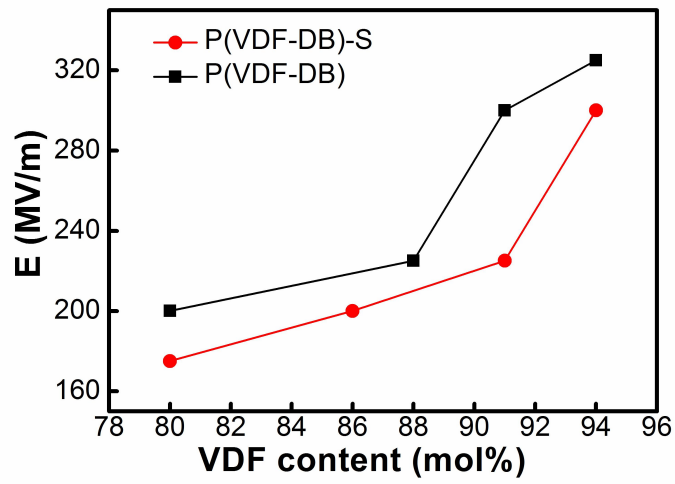

Fig. S5. Phase transition field of P(VDF-CTFE) and P(VDF-DB).

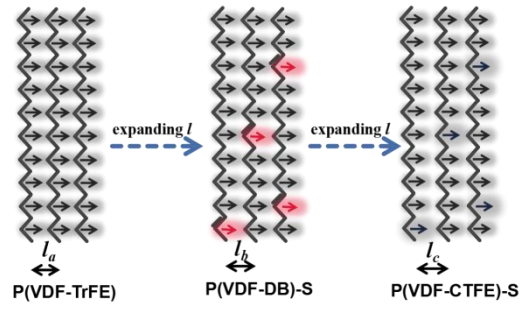

**Schema. S1.** Chain distance of stretched-PVDF, stretched-P(VDF-CTFE) and stretched-P(VDF-DB) ( $l_a=4.53$  nm,  $l_b=4.77$  nm,  $l_c=4.97$  nm, VDF= 80 mol%)
